# Supplementary material
Source: ML conference proceedings conference paper supplement (https://openreview.net/forum?id=8ihVBYpMV4)

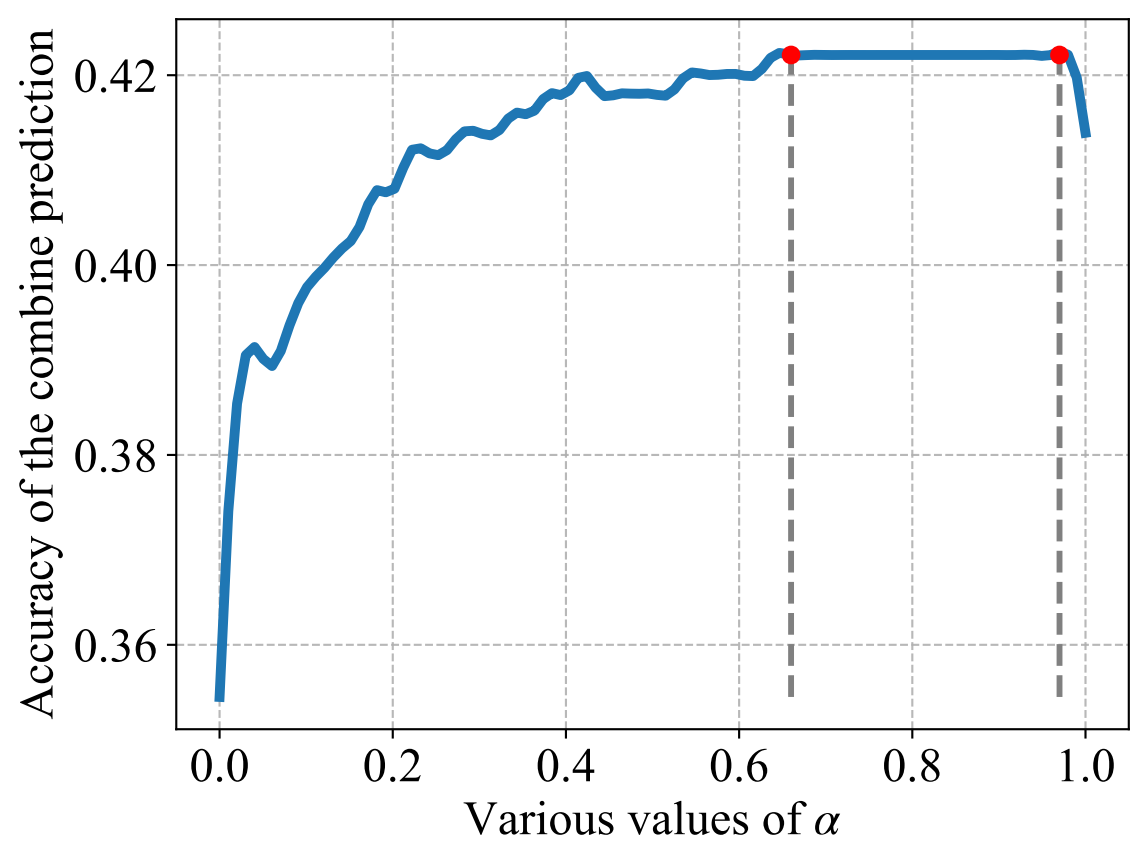

Supplement: supplementary_material [file attachment]

# Save Human check times per problem

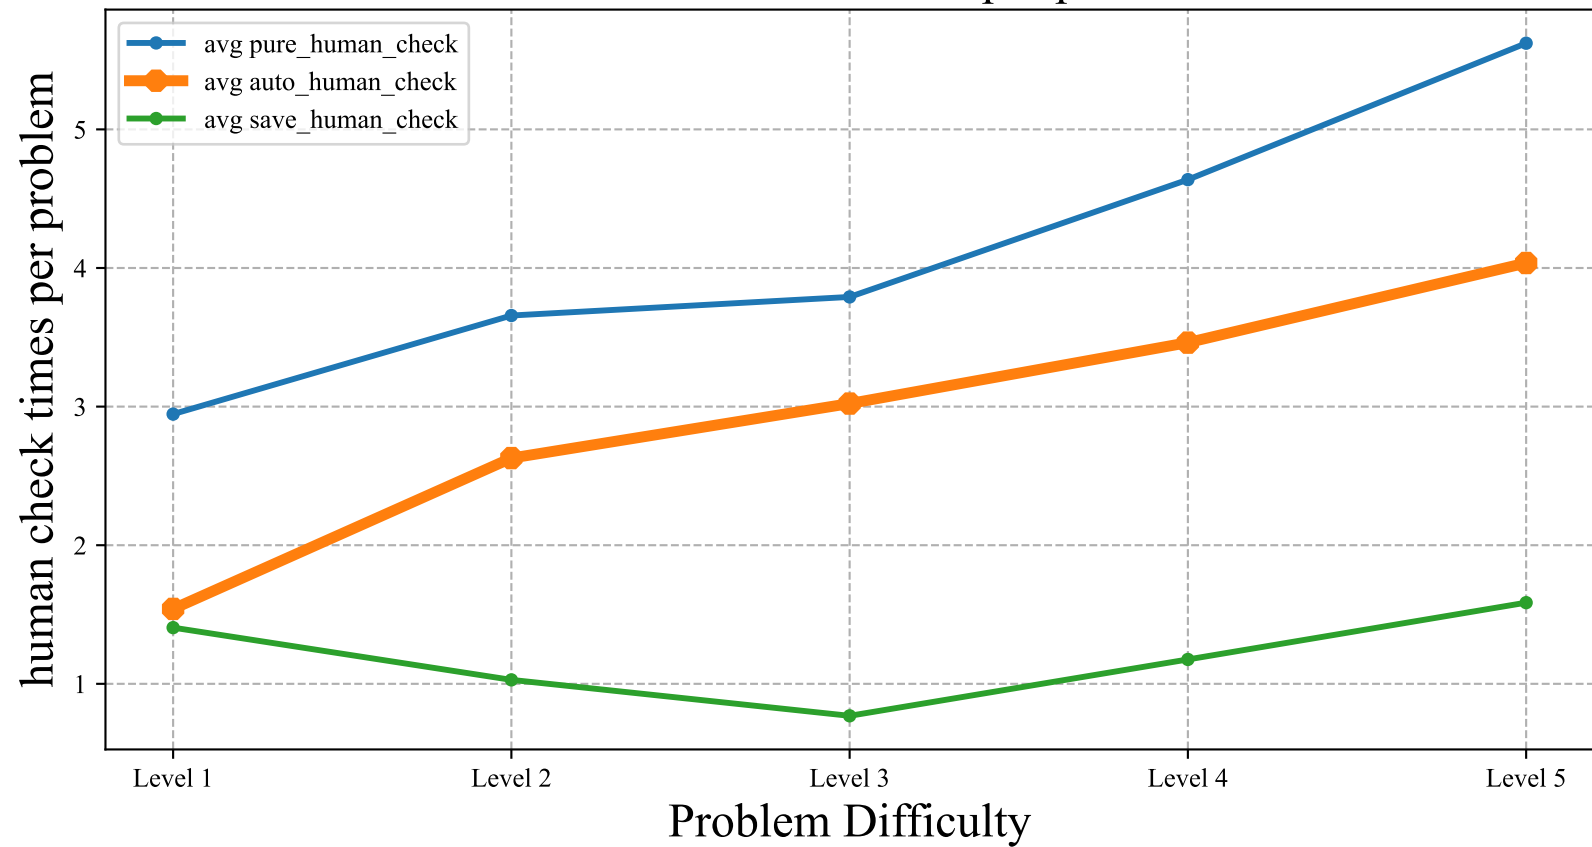

Supplement: supplementary_material [file attachment]

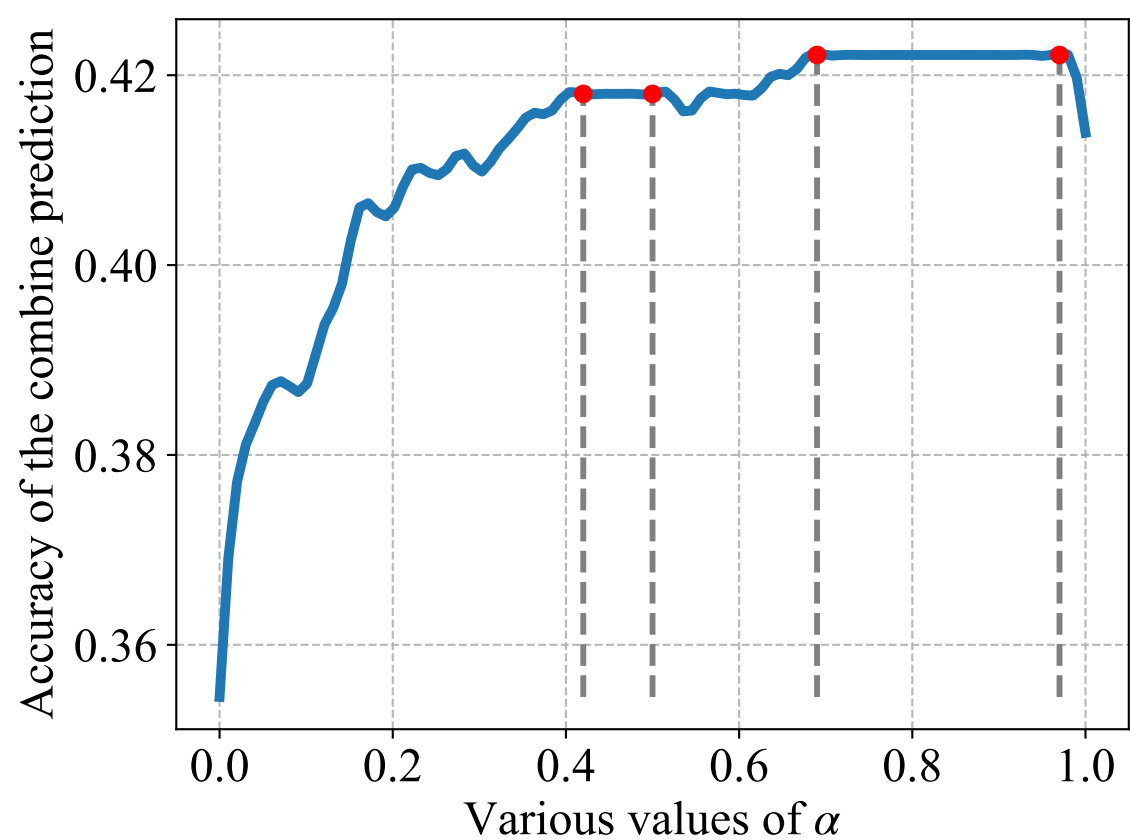

Supplement: supplementary_material [file attachment]

# Number of Components with Bars and Standard Deviation

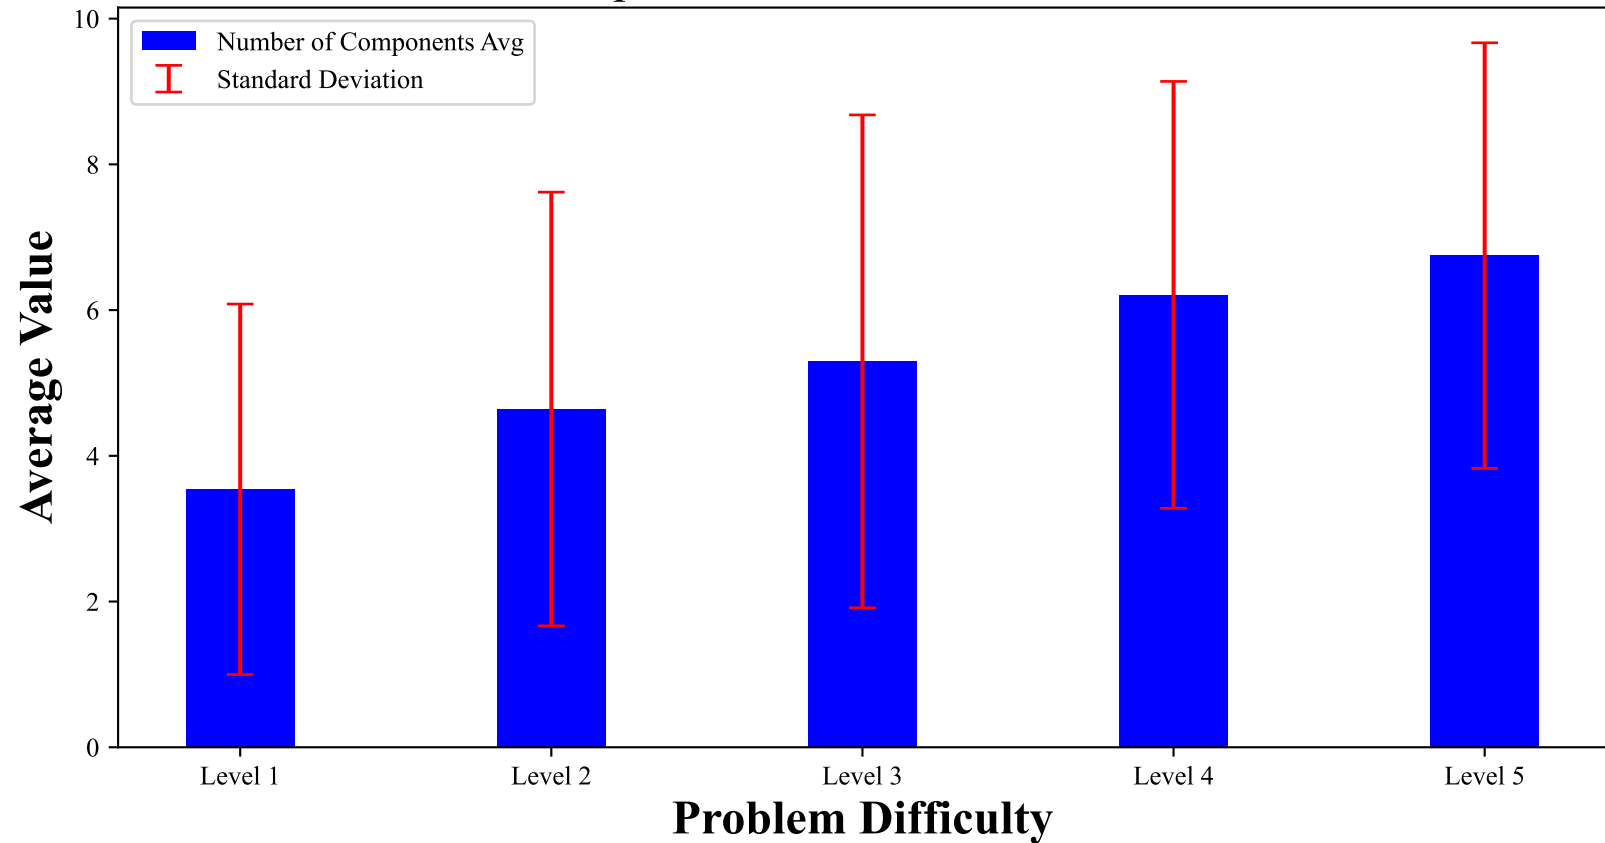

Supplement: supplementary_material [file attachment]

# Autoformalization Accuracy by Problem Difficulty

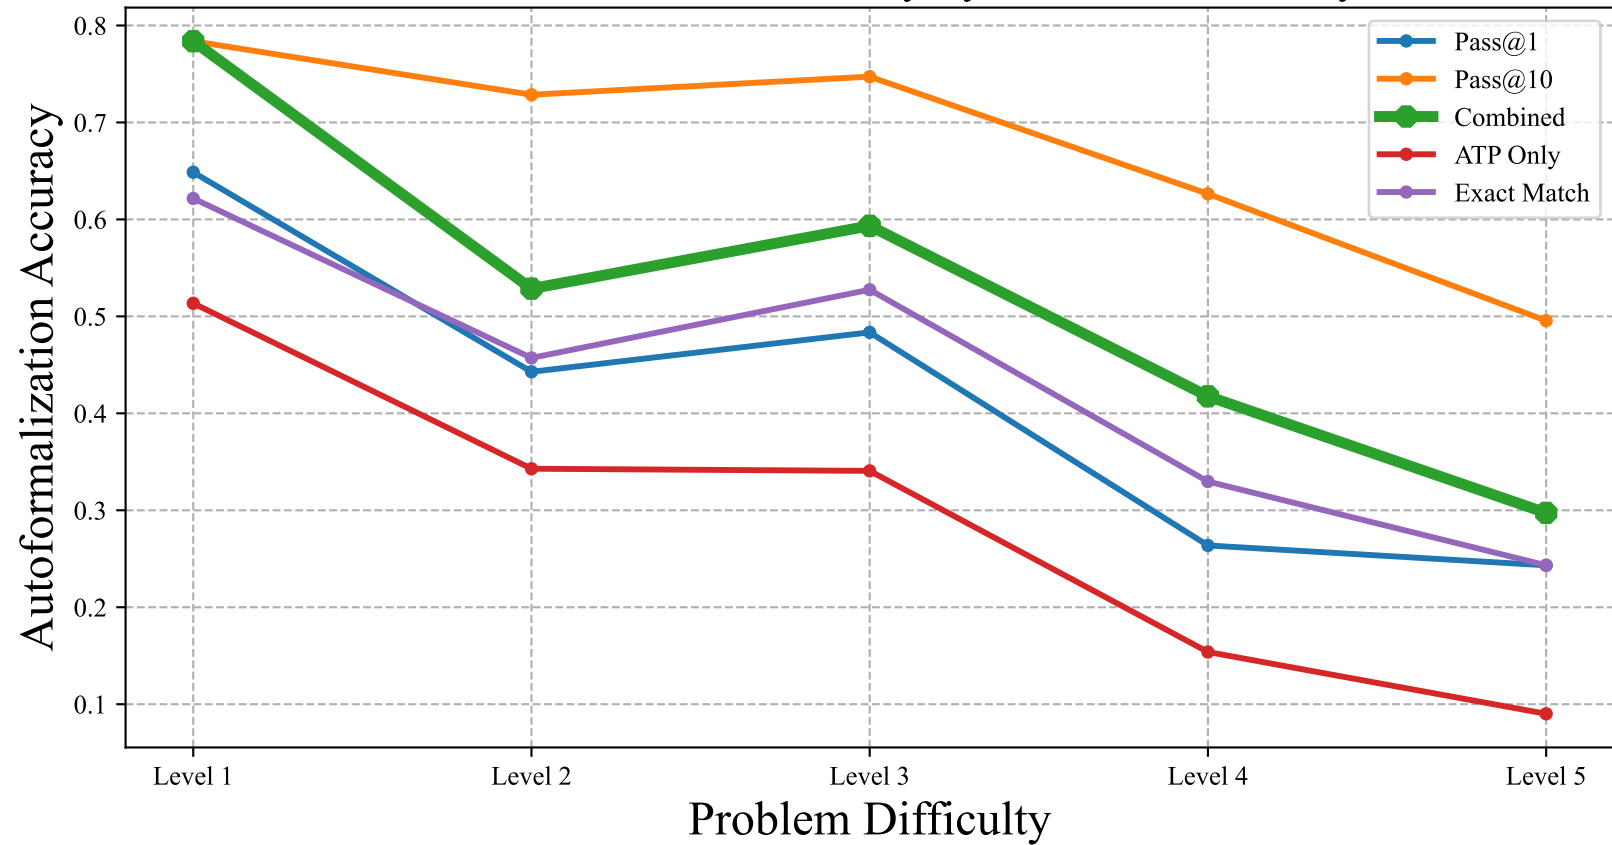

Supplement: supplementary_material [file attachment]

# Largest Components with Bars and Standard Deviation

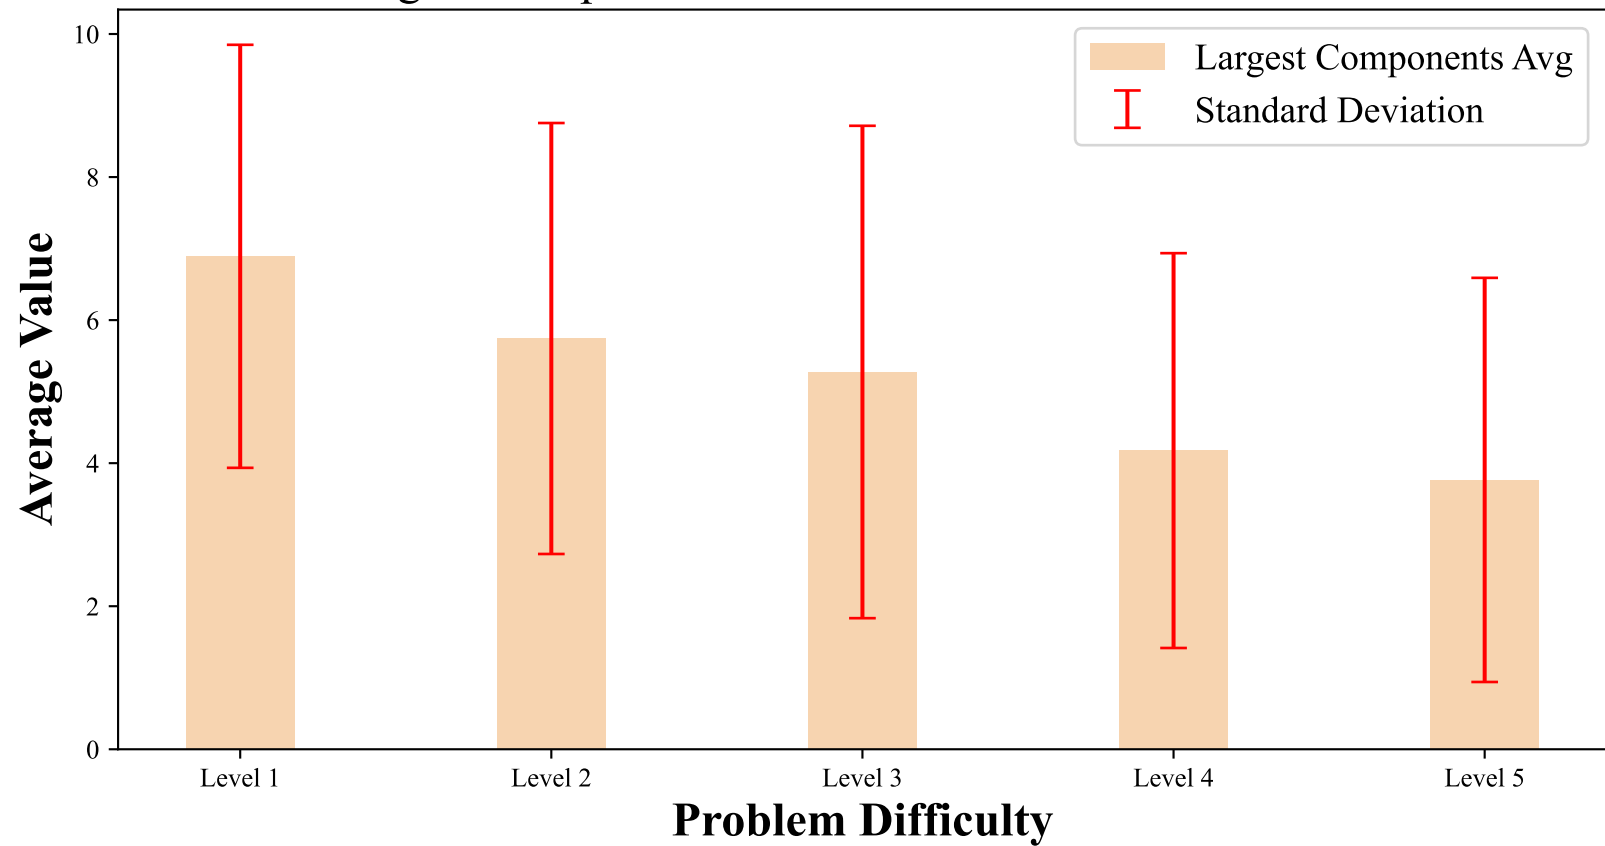

Supplement: supplementary_material [file attachment]

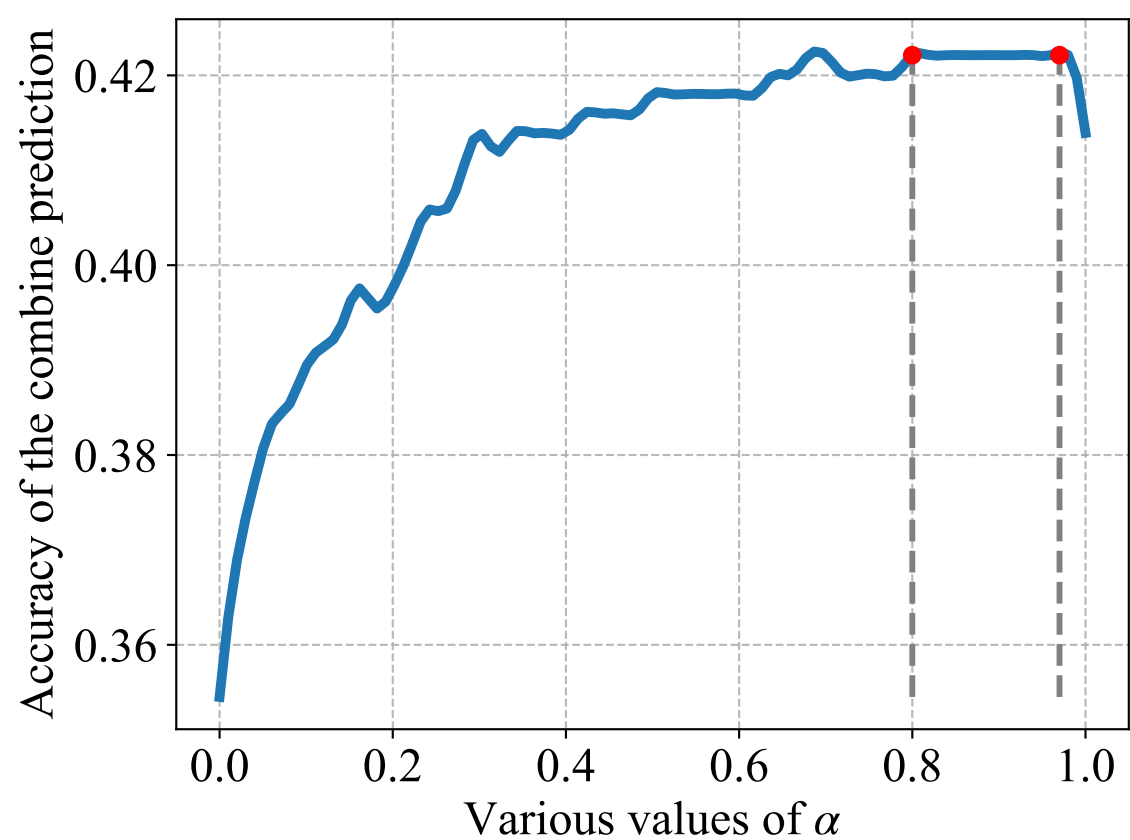

Supplement: supplementary_material [file attachment]

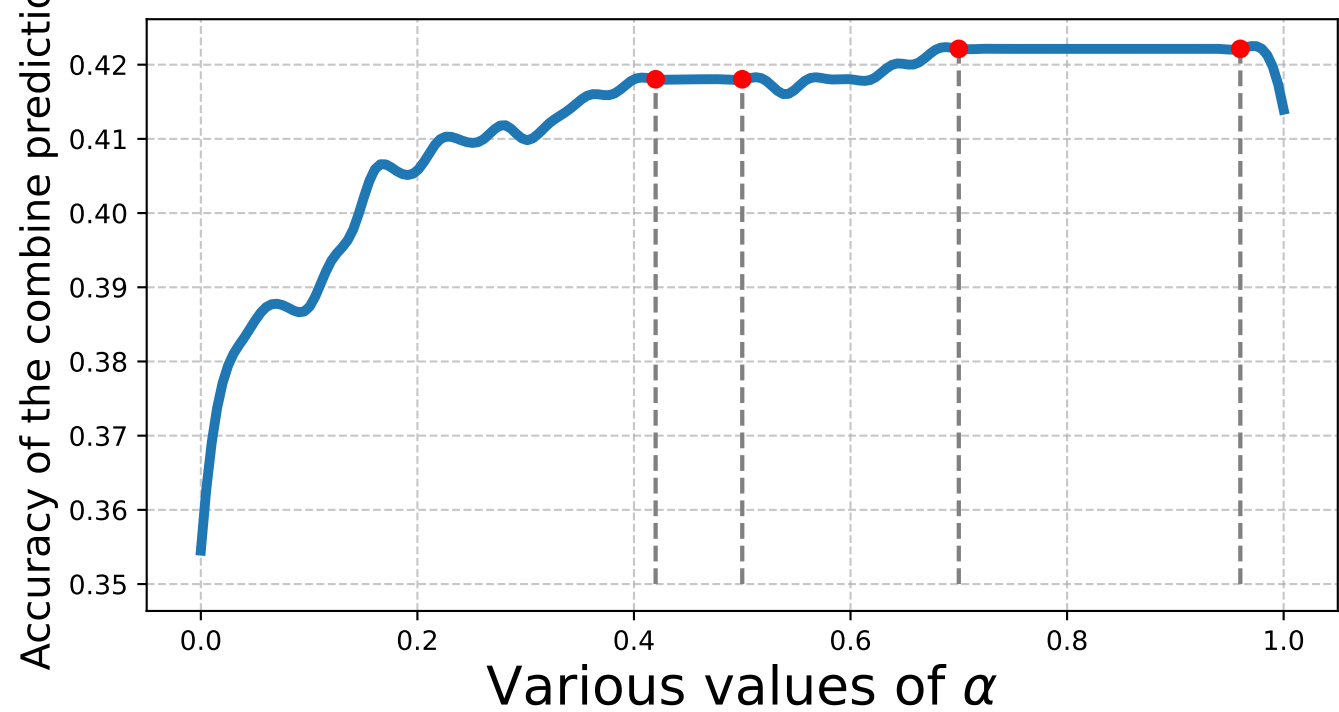

Supplement: supplementary_material [file attachment]

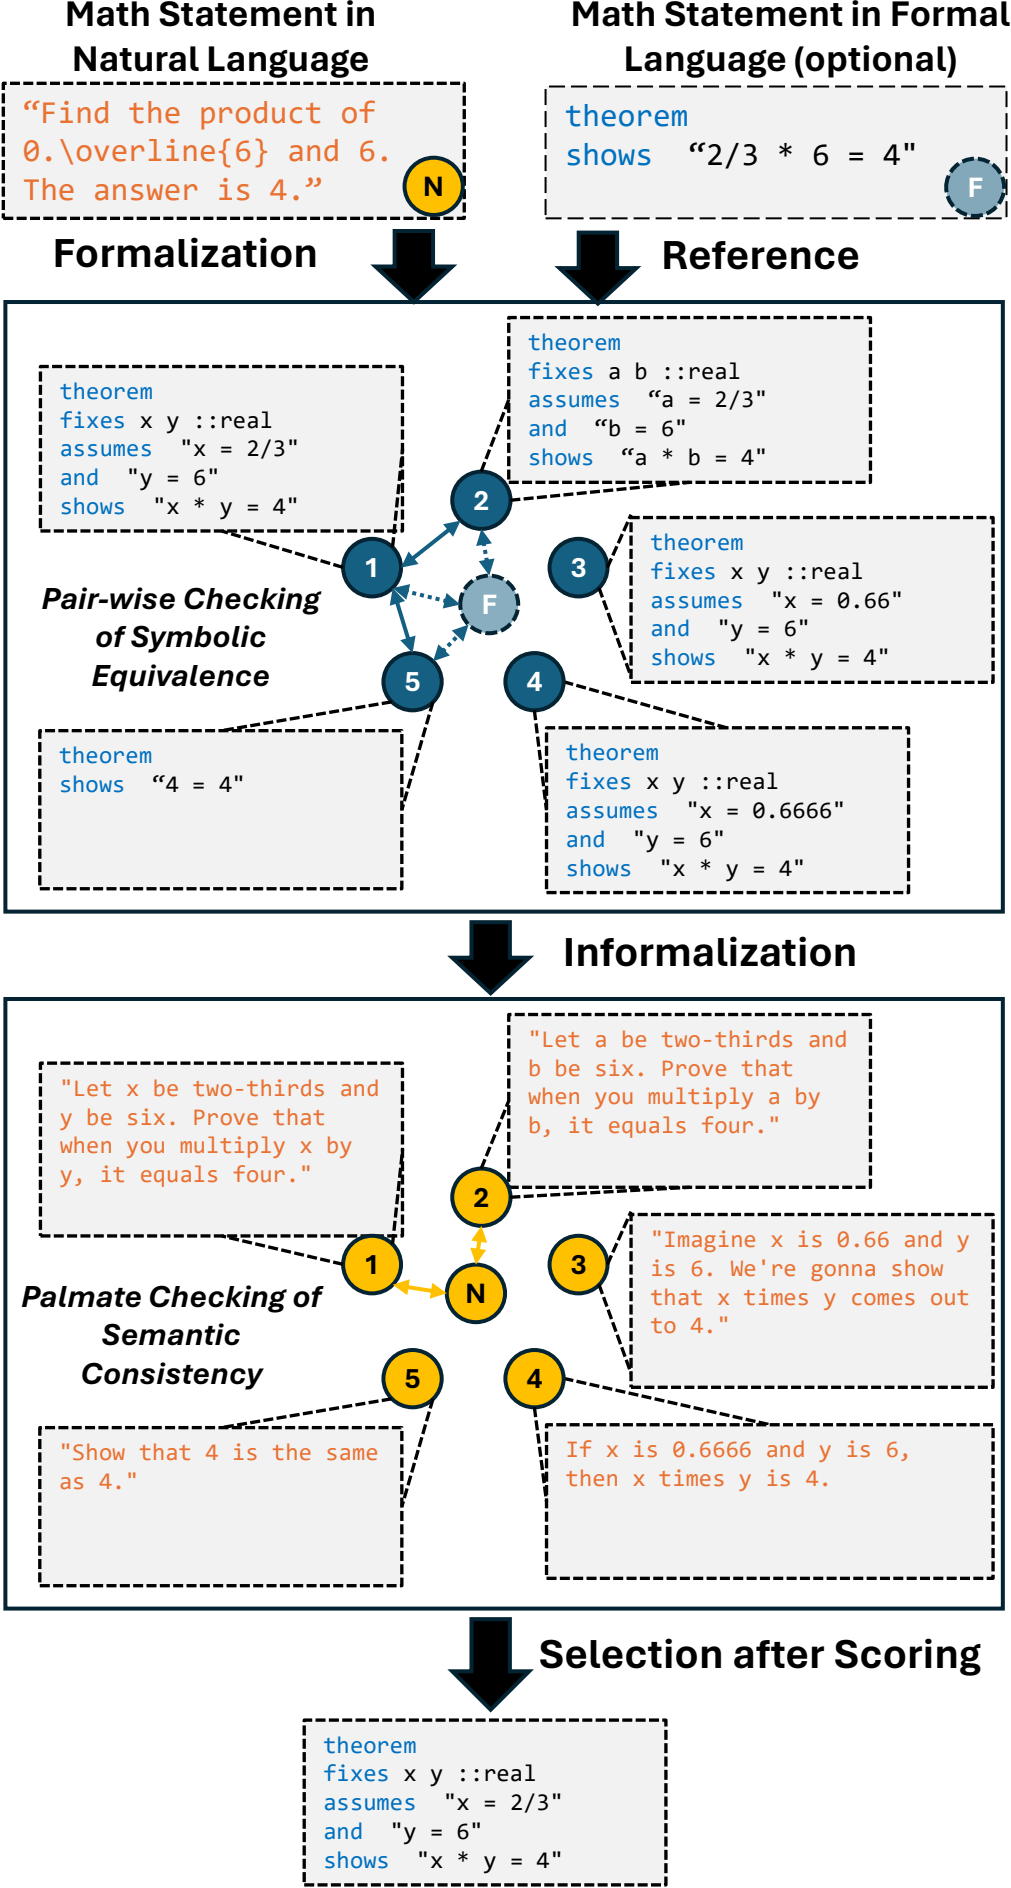

Supplement: supplementary_material [file attachment]
